# Supplementary material for: Effects of Hazelnut Consumption on Cardiometabolic Risk Factors and Acceptance: A Systematic Review
Source: MDPI journal article supplement (doi:10.3390/ijerph19052880), 2022-03-01
Supplement: s1 [file s1]

**Table S1.** Search terms

| Order | Terms                                                                                                                                                                                                                                                                             |
|-------|-----------------------------------------------------------------------------------------------------------------------------------------------------------------------------------------------------------------------------------------------------------------------------------|
| #1    | "hazelnut*" or "filbert*" or "cobnut*" or "corylus avellana"                                                                                                                                                                                                                      |
| #2    | "lipid*" or "cholesterol" or "lipoprotein*" or "apolipoprotein*" or "apo" or "HDL" or "LDL" or "tri-glyc*"                                                                                                                                                                        |
| #3    | "heart disease" or "cardiovascular disease" or "coronary heart disease" or "ischaemic heart disease" or "ischemic heart disease" or "CVD" or "CHD" or "IHD"                                                                                                                       |
| #4    | "glycaemic control" or "glycemic control" or "glucose" or "insulin" or "HbA1c" or "glycated haemoglobin" or "glycated hemoglobin" or "HOMA-IR" or "homeostatic model assessment" or "homeostasis model assessment" or "diabet*" or "metabolic syndrome"                           |
| #5    | "hypertens*" or "stroke" or "blood pressure" or "systolic" or "diastolic"                                                                                                                                                                                                         |
| #6    | "tocopherol*" or "tocotrienol*" or "vitamin E"                                                                                                                                                                                                                                    |
| #7    | "antioxid*" or "oxidati*" or "inflamm*" or "endotheli*" or "CRP" or "C reactive protein" or "fibrinogen" or "white blood cell*" or "neutrophil*" or "interleukin*" or "cytokine*" or "ICAM" or "VCAM" or "adhesion molecule" or "I-CAM" or "V-CAM" or "IL-6" or "IL-1" or "IL-10" |
| #8    | "body weight" or "body mass index" or "BMI" or "obes*" or "overweight" or "waist" or "adipos*" or "body fat"                                                                                                                                                                      |
| #9    | "acceptance" or "liking" or "desire to consume" or "desire to eat" or "sati*" or "appetite"                                                                                                                                                                                       |
